# Supplementary material for: Classification of Sharks in the Egyptian Mediterranean Waters Using Morphological and DNA Barcoding Approaches
Source: PubMed Central journal article supplement (PMC3206905; doi:10.1371/journal.pone.0027001), 2011-11-02
Supplement: pone.0027001.s001.pdf [file pone.0027001.s001.pdf]

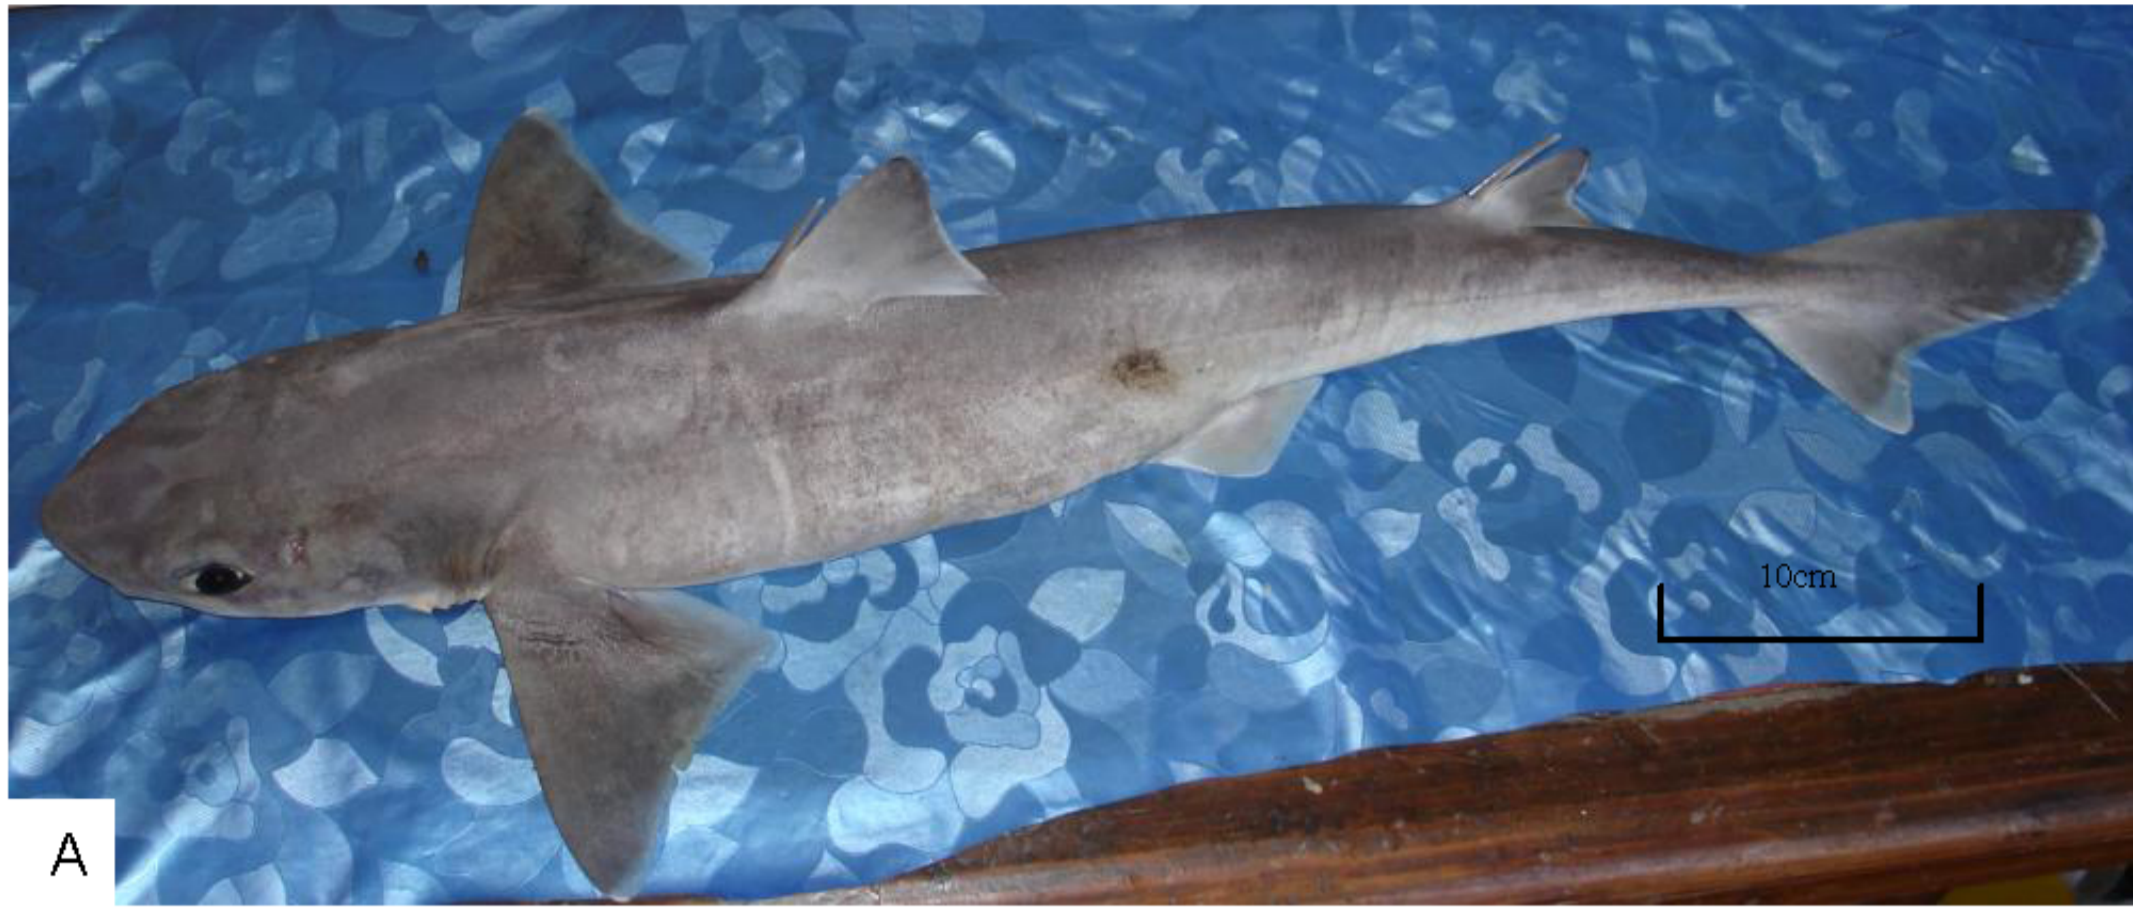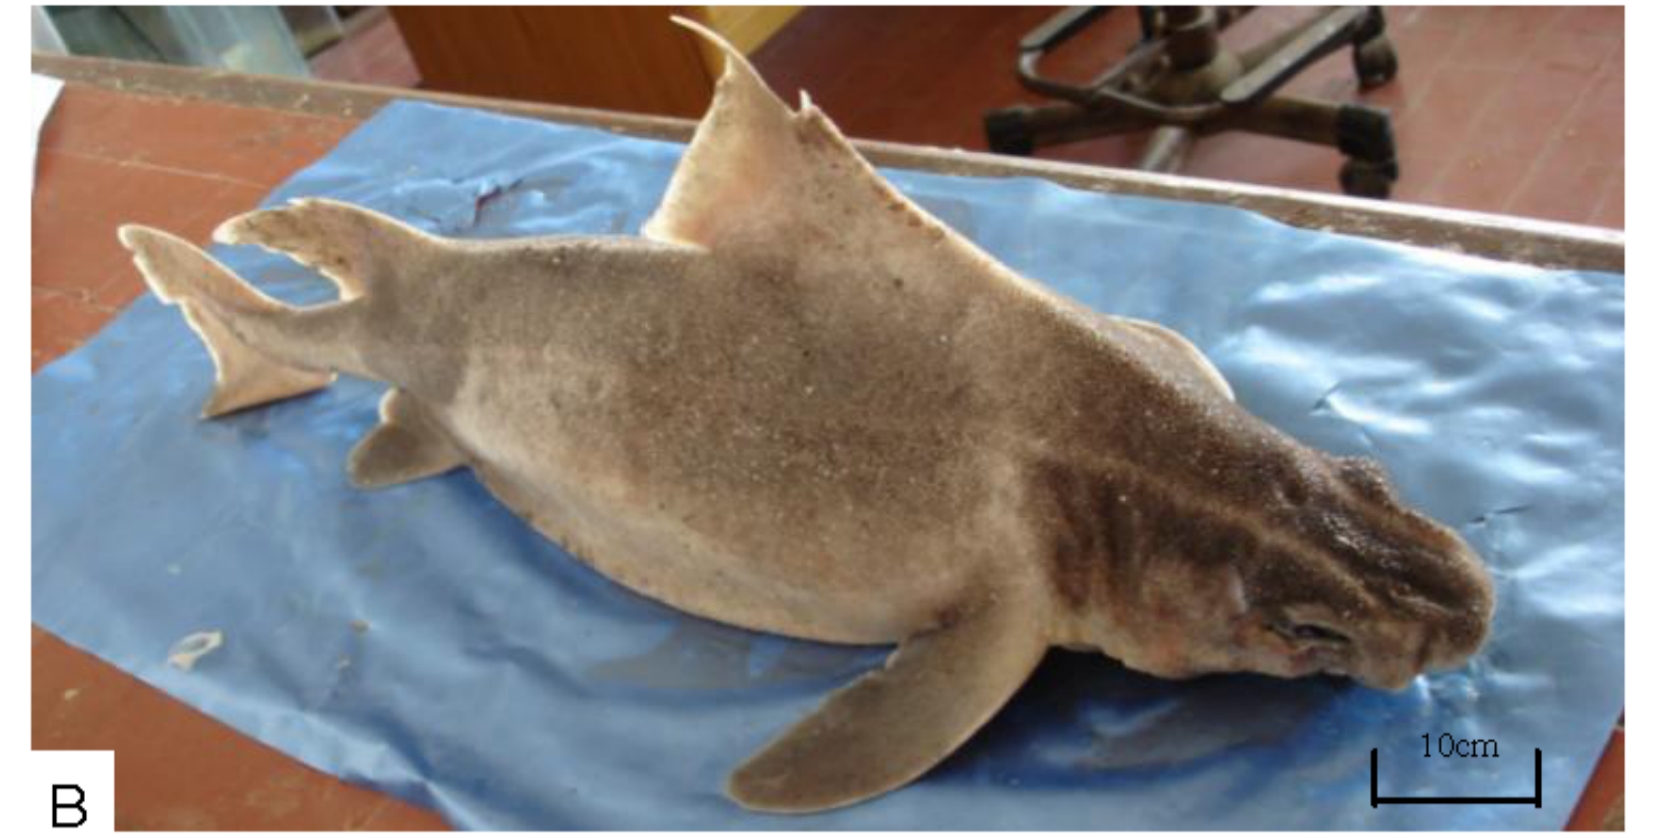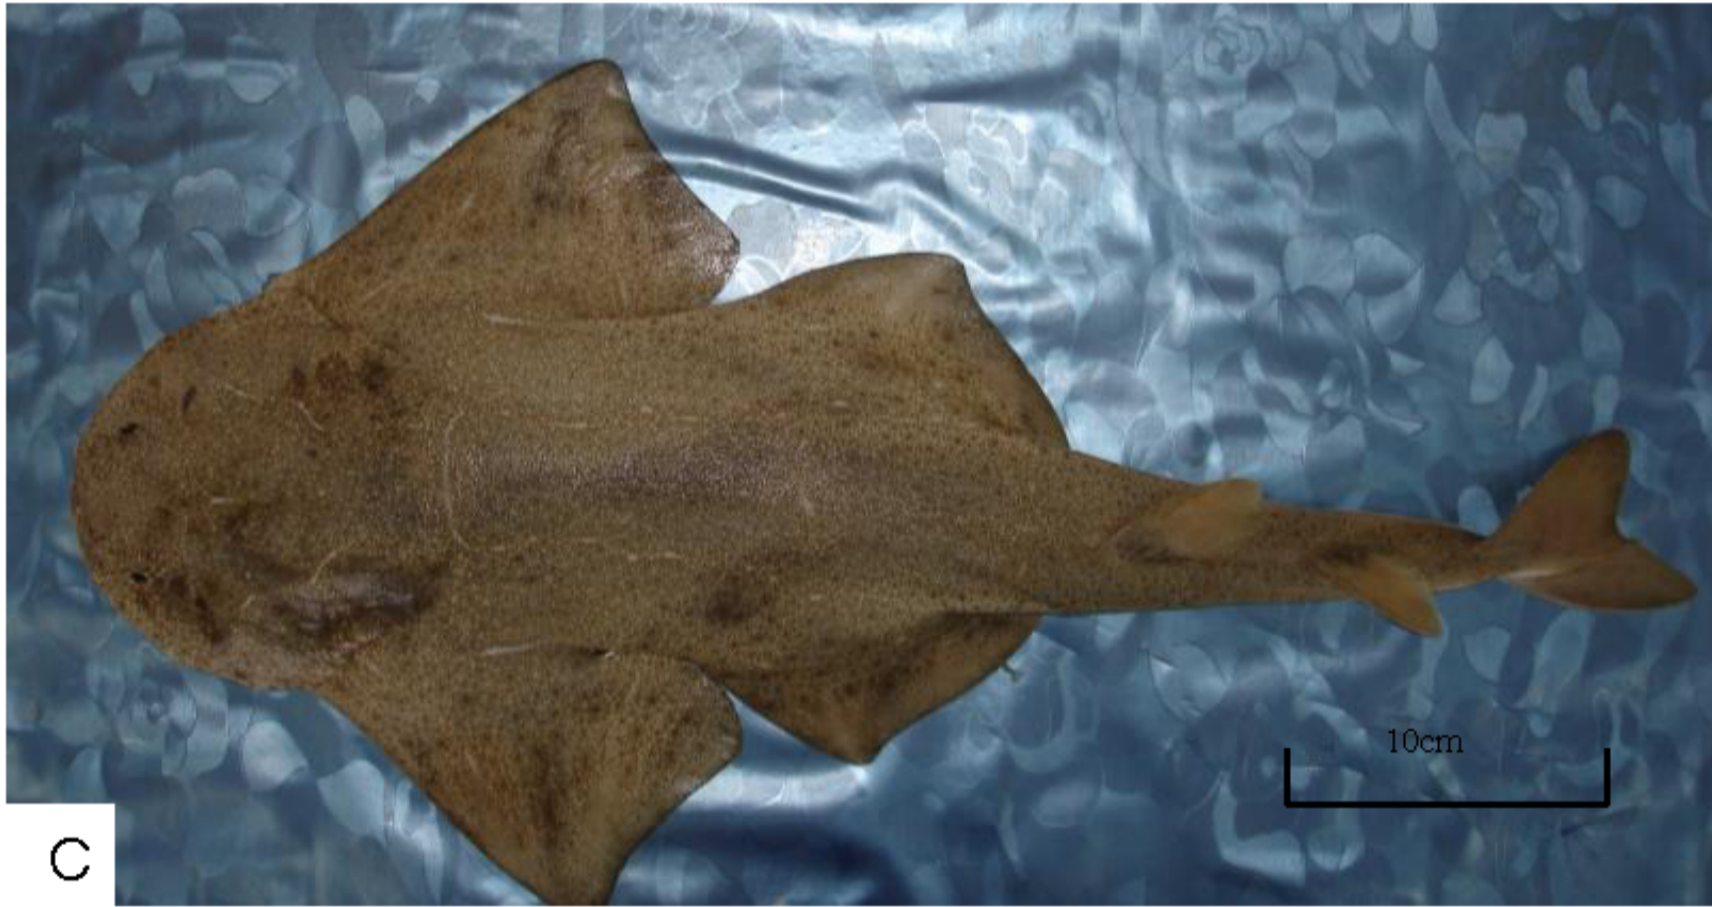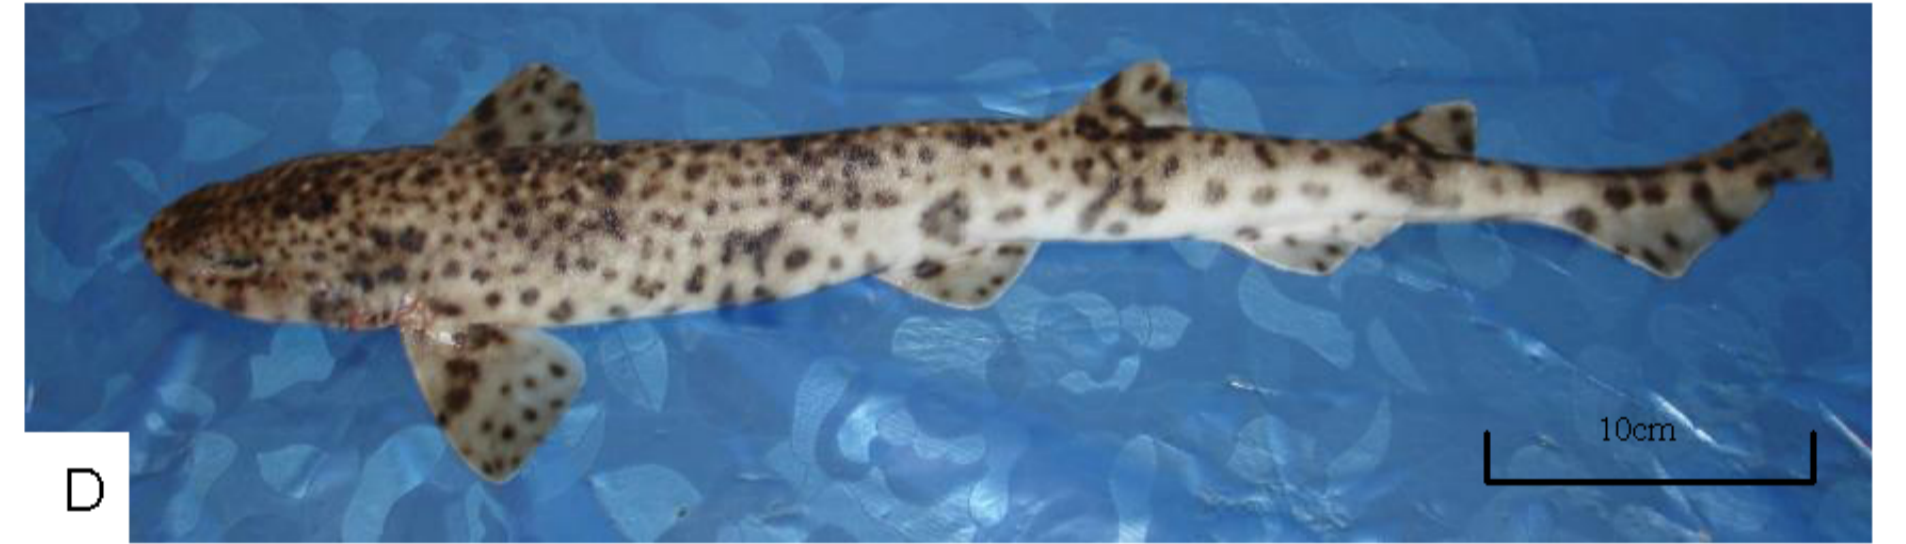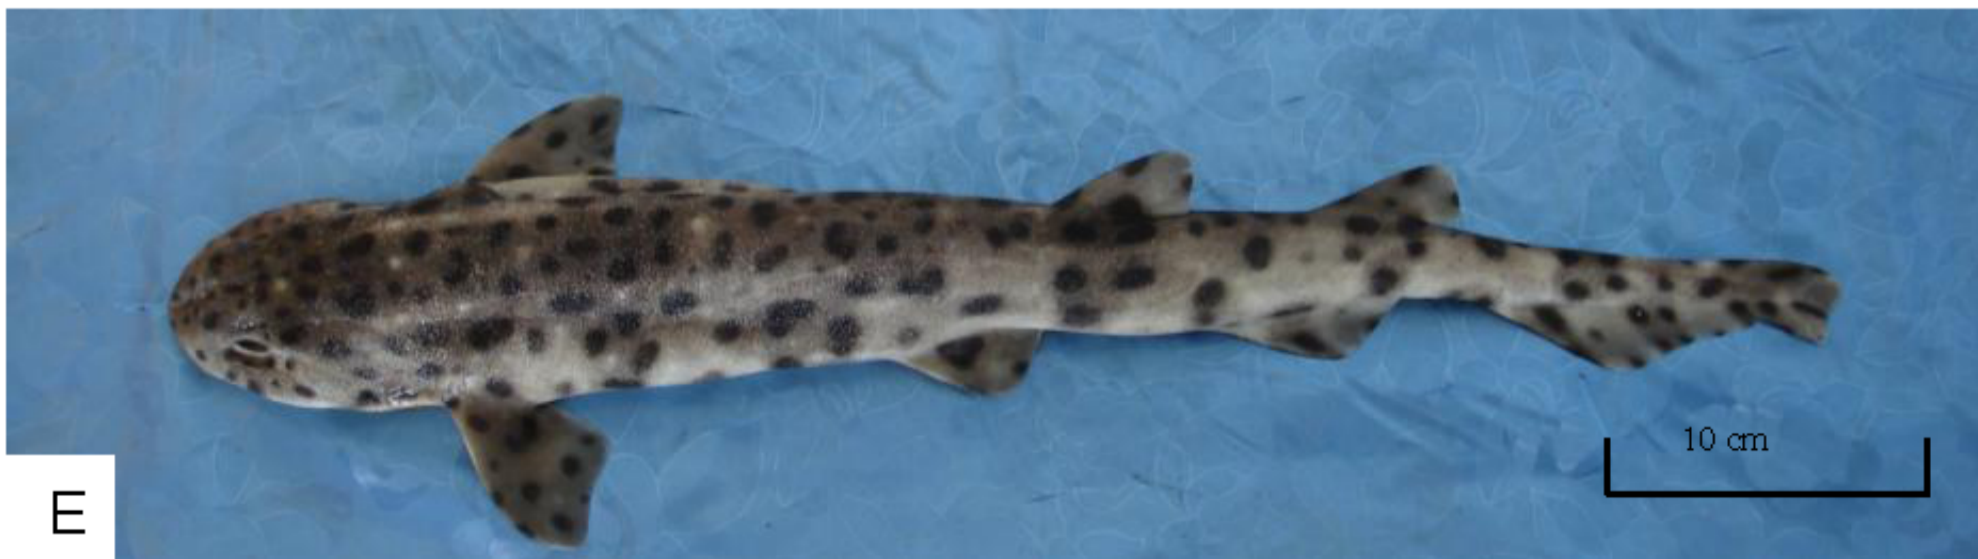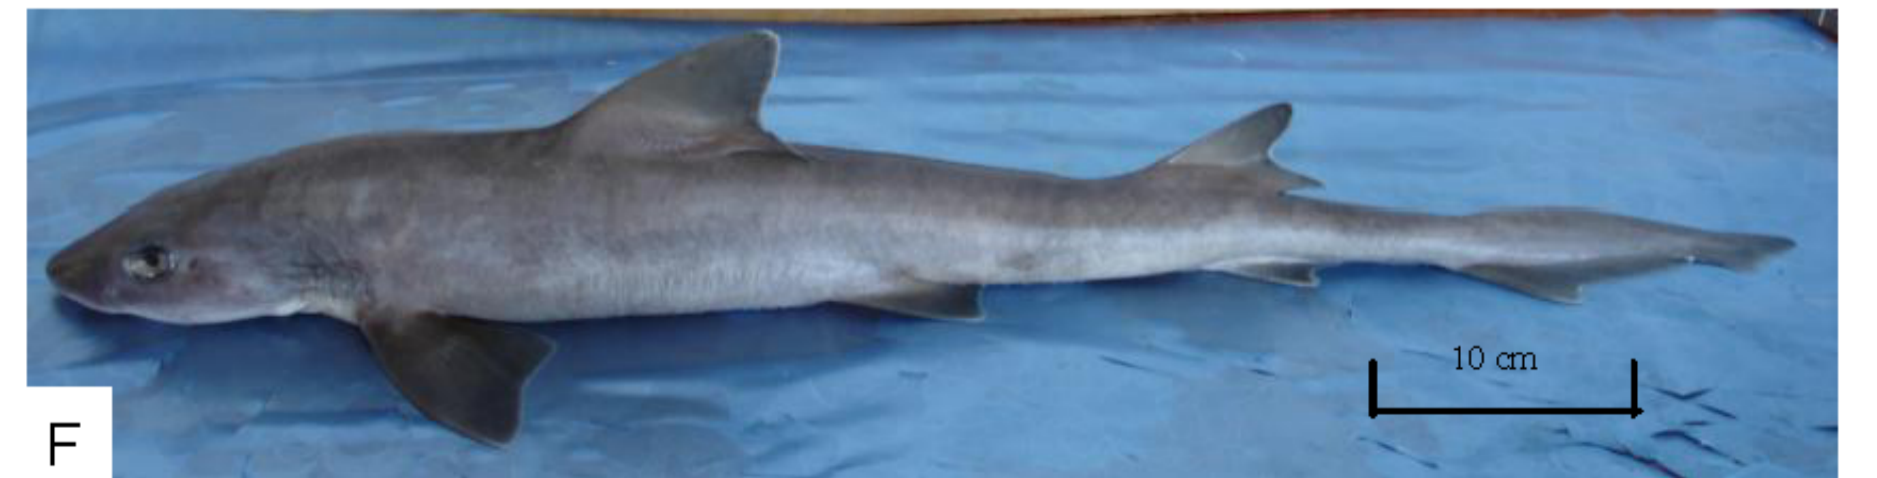

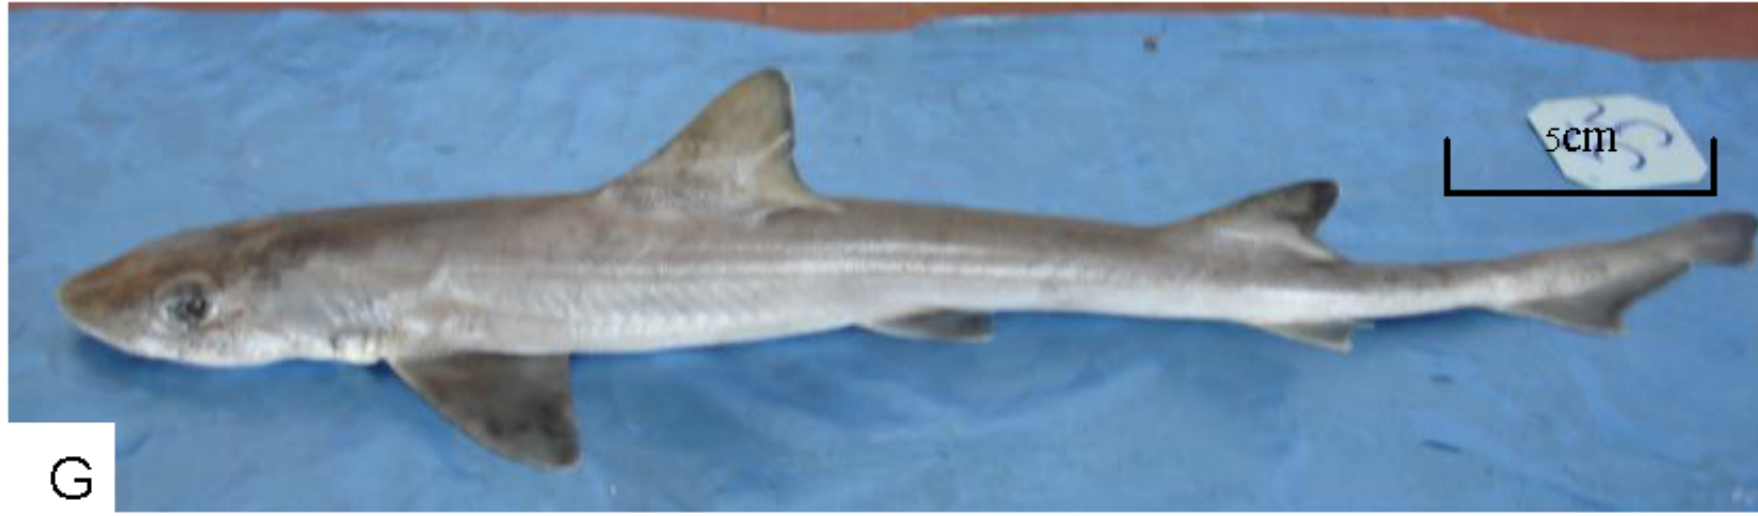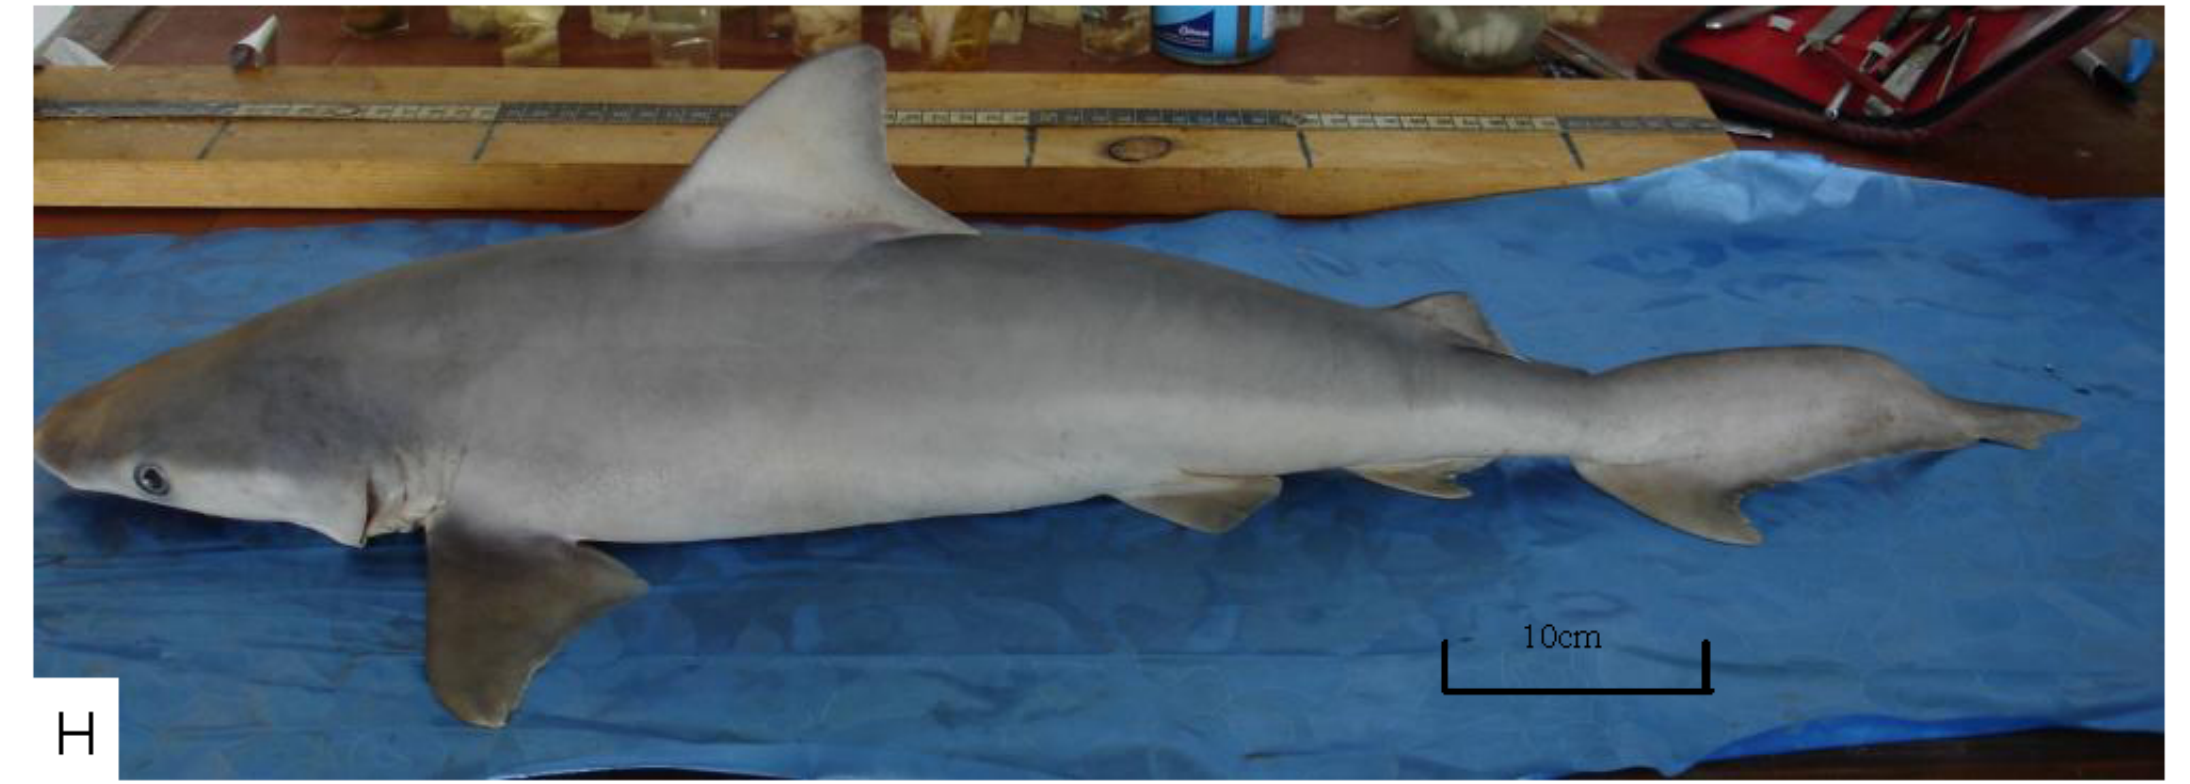

Figure S1: Specimens' pictures for each species under study

*A: Squalus acanthias; B: Oxynotus centrina; C: Squatina squatina; D: Scyliorhinus canicula; E: Scyliorhinus stellaris; F: Mustelus mustelus; G: Mustelus punctulatus and H: Carcharhinus altimus.*
