# Supplementary material for: Classification of Sharks in the Egyptian Mediterranean Waters Using Morphological and DNA Barcoding Approaches
Source: PubMed Central journal article supplement (PMC3206905; doi:10.1371/journal.pone.0027001), 2011-11-02
Supplement: pone.0027001.s002.pdf [file pone.0027001.s002.pdf]

| Sample no. | Test no. | GenBank                  |                | BOLD                          |              |                                      |              | Consensus identification    |
|------------|----------|--------------------------|----------------|-------------------------------|--------------|--------------------------------------|--------------|-----------------------------|
|            |          | Matched species          | Max identity % | First best matched species    | Similarity % | 2 <sup>nd</sup> best matched species | Similarity % |                             |
| 1          | Test (1) | <i>Mustelus mustelus</i> | 97             | <i>Mustelus mustelus</i>      | 98.31        | <i>Mustelus mustelus</i>             | 98.26        | <i>Mustelus mustelus</i>    |
|            | Test (2) | <i>Mustelus mustelus</i> | 100            | <i>Mustelus mustelus</i>      | 100          | <i>Mustelus mustelus</i>             | 100          |                             |
|            | Test (3) | <i>Mustelus mustelus</i> | 99             | <i>Mustelus mustelus</i>      | 99.83        | <i>Mustelus mustelus</i>             | 99.82        |                             |
| 2          | Test (1) | <i>Mustelus mustelus</i> | 100            | <i>Mustelus mustelus</i>      | 100          | <i>Mustelus mustelus</i>             | 100          | <i>Mustelus mustelus</i>    |
|            | Test (2) | <i>Mustelus mustelus</i> | 100            | <i>Mustelus mustelus</i>      | 100          | <i>Mustelus mustelus</i>             | 99.65        |                             |
|            | Test (3) | <i>Mustelus mustelus</i> | 100            | <i>Mustelus mustelus</i>      | 100          | <i>Mustelus mustelus</i>             | 99.69        |                             |
| 3          | Test (1) | <i>Mustelus mustelus</i> | 100            | <i>Mustelus mustelus</i>      | 100          | <i>Mustelus mustelus</i>             | 100          | <i>Mustelus mustelus</i>    |
|            | Test (2) | <i>Mustelus mustelus</i> | 100            | <i>Mustelus mustelus</i>      | 100          | <i>Mustelus mustelus</i>             | 100          |                             |
|            | Test (3) | <i>Mustelus mustelus</i> | 100            | <i>Mustelus mustelus</i>      | 100          | <i>Mustelus mustelus</i>             | 100          |                             |
| 5          | Test (1) | <i>Mustelus mustelus</i> | 100            | <i>Mustelus mustelus</i>      | 100          | <i>Mustelus mustelus</i>             | 100          | <i>Mustelus mustelus</i>    |
|            | Test (2) | <i>Mustelus mustelus</i> | 100            | <i>Mustelus mustelus</i>      | 100          | <i>Mustelus mustelus</i>             | 100          |                             |
|            | Test (3) | <i>Mustelus mustelus</i> | 100            | <i>Mustelus mustelus</i>      | 100          | <i>Mustelus mustelus</i>             | 100          |                             |
| 6          | Test (1) | <i>Mustelus henlei</i>   | 85             | <i>Mustelus punctulatus</i>   | 100          | <i>Mustelus punctulatus</i>          | 100          | <i>Mustelus punctulatus</i> |
|            | Test (2) | <i>Mustelus sp.</i>      | 100            | <i>Mustelus punctulatus</i>   | 100          | <i>Mustelus punctulatus</i>          | 100          |                             |
|            | Test (3) | <i>Mustelus sp.</i>      | 95             | X                             | X            | X                                    | X            |                             |
| 7          | Test (1) | <i>Mustelus sp.</i>      | 99             | <i>Mustelus punctulatus</i>   | 99.51        | <i>Mustelus punctulatus</i>          | 99.51        | <i>Mustelus punctulatus</i> |
|            | Test (2) | <i>Mustelus sp.</i>      | 100            | <i>Mustelus punctulatus</i>   | 100          | <i>Mustelus punctulatus</i>          | 100          |                             |
|            | Test (3) | <i>Mustelus sp.</i>      | 99             | <i>Mustelus punctulatus</i>   | 99.84        | <i>Mustelus punctulatus</i>          | 99.84        |                             |
| 8          | Test (1) | <i>Mustelus sp.</i>      | 100            | <i>Mustelus punctulatus</i>   | 100          | <i>Mustelus punctulatus</i>          | 100          | <i>Mustelus punctulatus</i> |
|            | Test (2) | <i>Mustelus sp.</i>      | 99             | <i>Mustelus punctulatus</i>   | 99.84        | <i>Mustelus punctulatus</i>          | 99.84        |                             |
|            | Test (3) | <i>Mustelus sp.</i>      | 99             | <i>Mustelus sp. zpl 00058</i> | 99.82        | <i>Mustelus punctulatus</i>          | 99.69        |                             |
| 9          | Test (1) | <i>Mustelus sp.</i>      | 87             | <i>Mustelus punctulatus</i>   | 99.05        | <i>Mustelus punctulatus</i>          | 99.05        | <i>Mustelus punctulatus</i> |
|            | Test (2) | Zebrafish                | 100            | X                             | X            | X                                    | X            |                             |
|            | Test (3) | <i>Mustelus sp.</i>      | 100            | <i>Mustelus sp. zpl 00058</i> | 100          | <i>Mustelus punctulatus</i>          | 99.68        |                             |
| 10         | Test (1) | <i>Mustelus mustelus</i> | 100            | <i>Mustelus mustelus</i>      | 100          | <i>Mustelus mustelus</i>             | 100          | <i>Mustelus mustelus</i>    |
|            | Test (2) | <i>Mustelus mustelus</i> | 100            | <i>Mustelus mustelus</i>      | 100          | <i>Mustelus mustelus</i>             | 99.84        |                             |
|            | Test (3) | <i>Mustelus mustelus</i> | 99             | <i>Mustelus mustelus</i>      | 98.75        | <i>Mustelus mustelus</i>             | 98.65        |                             |
| 11         | Test (1) | <i>Mustelus sp.</i>      | 99             | <i>Mustelus sp. zpl 00058</i> | 99.29        | <i>Mustelus punctulatus</i>          | 98.9         | <i>Mustelus punctulatus</i> |
|            | Test (2) | <i>Mustelus sp.</i>      | 100            | <i>Mustelus punctulatus</i>   | 100          | <i>Mustelus punctulatus</i>          | 100          |                             |
|            | Test (3) | <i>Mustelus sp.</i>      | 100            | <i>Mustelus sp. zpl 00058</i> | 100          | <i>Mustelus punctulatus</i>          | 99.84        |                             |

| Sample no. | Test no. | GenBank                       |                | BOLD                          |              |                                      |              | Consensus identification      |
|------------|----------|-------------------------------|----------------|-------------------------------|--------------|--------------------------------------|--------------|-------------------------------|
|            |          | Matched species               | Max identity % | First best matched species    | Similarity % | 2 <sup>nd</sup> best matched species | Similarity % |                               |
| 12         | Test (1) | <i>Mustelus sp.</i>           | 100            | <i>Mustelus punctulatus</i>   | 100          | <i>Mustelus punctulatus</i>          | 100          | <i>Mustelus punctulatus</i>   |
|            | Test (2) | <i>Mustelus sp</i>            | 100            | <i>Mustelus punctulatus</i>   | 100          | <i>Mustelus punctulatus</i>          | 100          |                               |
|            | Test (3) | <i>Mustelus sp.</i>           | 96             | X                             | X            | X                                    | X            |                               |
| 13         | Test (1) | <i>Mustelus lunulatus</i>     | 92             | X                             | X            | X                                    | X            | <i>Mustelus mustelus</i>      |
|            | Test (2) | <i>Mustelus mustelus</i>      | 100            | <i>Mustelus mustelus</i>      | 100          | <i>Mustelus mustelus</i>             | 100          |                               |
|            | Test (3) | <i>Mustelus mustelus</i>      | 100            | <i>Mustelus mustelus</i>      | 100          | <i>Mustelus mustelus</i>             | 99.84        |                               |
| 14         | Test (1) | <i>Mustelus mustelus</i>      | 87             | <i>Mustelus mustelus</i>      | 97.36        | <i>Mustelus mustelus</i>             | 97.36        | <i>Mustelus mustelus</i>      |
|            | Test (2) | <i>Mustelus mustelus</i>      | 100            | <i>Mustelus mustelus</i>      | 100          | <i>Mustelus mustelus</i>             | 99.84        |                               |
|            | Test (3) | <i>Mustelus mustelus</i>      | 79             | X                             | X            | X                                    | X            |                               |
| 16         | Test (1) | <i>Mustelus mustelus</i>      | 100            | <i>Mustelus mustelus</i>      | 100          | <i>Mustelus mustelus</i>             | 100          | <i>Mustelus mustelus</i>      |
|            | Test (2) | <i>Mustelus mustelus</i>      | 99             | <i>Mustelus mustelus</i>      | 99.82        | <i>Mustelus mustelus</i>             | 99.69        |                               |
|            | Test (3) | <i>Mustelus mustelus</i>      | 99             | <i>Mustelus mustelus</i>      | 99.82        | <i>Mustelus mustelus</i>             | 99.48        |                               |
| 17         | Test (2) | <i>Squalus sp.</i>            | 99             | <i>Squalus acanthias</i>      | 100          | <i>Squalus acanthias</i>             | 100          | <i>Squalus acanthias</i>      |
|            | Test (3) | <i>Squalus sp.</i>            | 99             | <i>Squalus acanthias</i>      | 99.84        | <i>Squalus blainville</i>            | 99.84        |                               |
| 18         | Test (2) | <i>Squalus sp.</i>            | 99             | <i>Squalus acanthias</i>      | 99.83        | <i>Squalus blainville</i>            | 99.53        | <i>Squalus acanthias</i>      |
|            | Test (3) | <i>Squalus sp.</i>            | 99             | <i>Squalus acanthias</i>      | 100          | <i>Squalus blainville</i>            | 99.68        |                               |
| 19         | Test (2) | <i>Squalus megalops</i>       | 82             | <i>Squalus acanthias</i>      | 98.7(solid)  | <i>Squalus blainville</i>            | 98.31        | <i>Squalus acanthias</i>      |
|            | Test (3) | <i>Squalus megalops</i>       | 99             | <i>Squalus blainville</i>     | 99.84        | <i>Squalus blainville</i>            | 99.84        |                               |
| 20         | Test (2) | <i>Squalus sp.</i>            | 81             | X                             | X            | X                                    | X            | <i>Squalus acanthias</i>      |
|            | Test (3) | <i>Squalus megalops</i>       | 99             | <i>Squalus acanthias</i>      | 100          | <i>Squalus acanthias</i>             | 100          |                               |
| 22         | Test (2) | <i>Squalus sp.</i>            | 99             | <i>Squalus acanthias</i>      | 99.84        | <i>Squalus blainville</i>            | 99.84        | <i>Squalus acanhias</i>       |
|            | Test (3) | <i>Hippocampus angustus</i>   | 76             | X                             | X            | X                                    | X            |                               |
| 25         | Test (1) | <i>Scyliorhinus stellaris</i> | 100            | <i>Scyliorhinus stellaris</i> | 100(solid)   | <i>Scyliorhinus stellaris</i>        | 99.51        | <i>Scyliorhinus stellaris</i> |
|            | Test (2) | <i>Gallus gallus</i>          | 87             | X                             | X            | X                                    | X            |                               |
|            | Test (3) | <i>Scyliorhinus stellaris</i> | 99             | <i>Scyliorhinus stellaris</i> | 100(solid)   | <i>Scyliorhinus stellaris</i>        | 99.47        |                               |
| 26         | Test (1) | <i>Scyliorhinus stellaris</i> | 86             | X                             | X            | X                                    | X            | <i>Scyliorhinus stellaris</i> |
|            | Test (2) | <i>Scyliorhinus stellaris</i> | 99             | <i>Scyliorhinus stellaris</i> | 100(solid)   | <i>Scyliorhinus stellaris</i>        | 99.5         |                               |
|            | Test (3) | <i>Scyliorhinus stellaris</i> | 100            | <i>Scyliorhinus stellaris</i> | 100(solid)   | <i>Scyliorhinus stellaris</i>        | 99.51        |                               |
| 27         | Test (1) | <i>Scyliorhinus stellaris</i> | 100            | <i>Scyliorhinus stellaris</i> | 100(solid)   | <i>Scyliorhinus stellaris</i>        | 99.51        | <i>Scyliorhinus stellaris</i> |
|            | Test (2) | <i>Scyliorhinus stellaris</i> | 100            | <i>Scyliorhinus stellaris</i> | 100(solid)   | <i>Scyliorhinus stellaris</i>        | 99.51        |                               |
|            | Test (3) | <i>Scyliorhinus stellaris</i> | 99             | <i>Scyliorhinus stellaris</i> | 100(solid)   | <i>Scyliorhinus stellaris</i>        | 99.5         |                               |
| 28         | Test (1) | <i>Scyliorhinus stellaris</i> | 100            | <i>Scyliorhinus stellaris</i> | 100(solid)   | <i>Scyliorhinus stellaris</i>        | 99.51        | <i>Scyliorhinus stellaris</i> |
|            | Test (2) | <i>Scyliorhinus stellaris</i> | 100            | <i>Scyliorhinus stellaris</i> | 100(solid)   | <i>Scyliorhinus stellaris</i>        | 99.51        |                               |
|            | Test (3) | <i>Mus musculus</i>           | 96             | X                             | X            | X                                    | X            |                               |

| Sample no. | Test no. | GenBank                       |                | BOLD                          |              |                                      |              | Consensus identification     |
|------------|----------|-------------------------------|----------------|-------------------------------|--------------|--------------------------------------|--------------|------------------------------|
|            |          | Matched species               | Max identity % | First best matched species    | Similarity%  | 2 <sup>nd</sup> best matched species | Similarity % |                              |
| 29         | Test (1) | <i>Scyliorhinus canicula</i>  | 99             | <i>Scyliorhinus stellaris</i> | 99.33(solid) | <i>Scyliorhinus stellaris</i>        | 98.86        | <i>Scyliorhinus canicula</i> |
|            | Test (2) | <i>Scyliorhinus canicula</i>  | 99             | <i>Scyliorhinus stellaris</i> | 99.84        | <i>Scyliorhinus stellaris</i>        | 99.84        |                              |
|            | Test (3) | <i>Scyliorhinus canicula</i>  | 99             | <i>Scyliorhinus stellaris</i> | 100          | <i>Scyliorhinus stellaris</i>        | 100          |                              |
| 30         | Test (1) | <i>Scyliorhinus canicula</i>  | 99             | <i>Scyliorhinus canicula</i>  | 100          | <i>Scyliorhinus stellaris</i>        | 99.84        | <i>Scyliorhinus canicula</i> |
|            | Test (2) | <i>Scyliorhinus canicula</i>  | 99             | <i>Scyliorhinus canicula</i>  | 100          | <i>Scyliorhinus stellaris</i>        | 99.84        |                              |
|            | Test (3) | <i>Scyliorhinus canicula</i>  | 98             | <i>Scyliorhinus canicula</i>  | 98.83        | <i>Scyliorhinus stellaris</i>        | 99.67        |                              |
| 31         | Test (1) | <i>Scyliorhinus canicula</i>  | 99             | <i>Scyliorhinus stellaris</i> | 100          | <i>Scyliorhinus stellaris</i>        | 100          | <i>Scyliorhinus canicula</i> |
|            | Test (2) | <i>Scyliorhinus stellaris</i> | 74             | X                             | X            | X                                    | X            |                              |
|            | Test (3) | marine zooplankton            | 79             | X                             | X            | X                                    | X            |                              |
| 32         | Test (1) | <i>Scyliorhinus canicula</i>  | 99             | <i>Scyliorhinus stellaris</i> | 100          | <i>Scyliorhinus stellaris</i>        | 100          | <i>Scyliorhinus canicula</i> |
|            | Test (2) | <i>Scyliorhinus canicula</i>  | 99             | <i>Scyliorhinus stellaris</i> | 100          | <i>Scyliorhinus stellaris</i>        | 100          |                              |
|            | Test (3) | <i>Scyliorhinus canicula</i>  | 99             | <i>Scyliorhinus stellaris</i> | 100          | <i>Scyliorhinus stellaris</i>        | 100          |                              |
| 33         | Test (1) | <i>Scyliorhinus canicula</i>  | 99             | <i>Scyliorhinus canicula</i>  | 100          | <i>Scyliorhinus canicula</i>         | 100          | <i>Scyliorhinus canicula</i> |
|            | Test (2) | <i>Scyliorhinus canicula</i>  | 99             | <i>Scyliorhinus canicula</i>  | 100          | <i>Scyliorhinus canicula</i>         | 100          |                              |
|            | Test (3) | <i>Scyliorhinus canicula</i>  | 99             | <i>Scyliorhinus canicula</i>  | 100          | <i>Scyliorhinus canicula</i>         | 100          |                              |
| 34         | Test (1) | <i>Scyliorhinus canicula</i>  | 79             | X                             | X            | X                                    | X            | <i>Scyliorhinus canicula</i> |
|            | Test (2) | <i>Scyliorhinus canicula</i>  | 99             | <i>Scyliorhinus stellaris</i> | 100          | <i>Scyliorhinus stellaris</i>        | 100          |                              |
|            | Test (3) | <i>Bos taurus</i> REX2        | 100            | X                             | X            | X                                    | X            |                              |
| 35         | Test (1) | <i>Scyliorhinus canicula</i>  | 99             | <i>Scyliorhinus canicula</i>  | 99.84        | <i>Scyliorhinus canicula</i>         | 99.84        | <i>Scyliorhinus canicula</i> |
|            | Test (2) | <i>Scatophagus argus</i>      | 76             | X                             | X            | X                                    | X            |                              |
|            | Test (3) | <i>Scyliorhinus canicula</i>  | 99             | <i>Scyliorhinus canicula</i>  | 99.84        | <i>Scyliorhinus canicula</i>         | 99.84        |                              |
| 36         | Test (1) | <i>Scyliorhinus canicula</i>  | 99             | <i>Scyliorhinus stellaris</i> | 98.69(solid) | <i>Scyliorhinus stellaris</i>        | 98.69        | <i>Scyliorhinus canicula</i> |
|            | Test (2) | <i>Scatophagus argus</i>      | 82             | X                             | X            | X                                    | X            |                              |
|            | Test (3) | <i>Scyliorhinus canicula</i>  | 99             | <i>Scyliorhinus stellaris</i> | 100          | <i>Scyliorhinus stellaris</i>        | 100          |                              |
| 37         | Test (1) | <i>Scyliorhinus canicula</i>  | 99             | <i>Scyliorhinus canicula</i>  | 100          | <i>Scyliorhinus canicula</i>         | 100          | <i>Scyliorhinus canicula</i> |
|            | Test (2) | <i>Scyliorhinus canicula</i>  | 99             | <i>Scyliorhinus canicula</i>  | 100          | <i>Scyliorhinus canicula</i>         | 100          |                              |
|            | Test (3) | <i>Scyliorhinus canicula</i>  | 99             | <i>Scyliorhinus canicula</i>  | 100          | <i>Scyliorhinus canicula</i>         | 99.69        |                              |
| 38         | Test (1) | <i>Scyliorhinus canicula</i>  | 98             | <i>Scyliorhinus stellaris</i> | 99.18        | <i>Scyliorhinus stellaris</i>        | 99.18        | <i>Scyliorhinus canicula</i> |
|            | Test (2) | <i>Scyliorhinus canicula</i>  | 99             | <i>Scyliorhinus stellaris</i> | 99.84        | <i>Scyliorhinus stellaris</i>        | 99.84        |                              |
|            | Test (3) | <i>Scyliorhinus canicula</i>  | 99             | <i>Scyliorhinus stellaris</i> | 99.84        | <i>Scyliorhinus stellaris</i>        | 99.84        |                              |
| 39         | Test (1) | <i>Scyliorhinus canicula</i>  | 98             | <i>Scyliorhinus canicula</i>  | 99.38        | <i>Scyliorhinus canicula</i>         | 99.38        | <i>Scyliorhinus canicula</i> |
|            | Test (2) | <i>Scyliorhinus canicula</i>  | 99             | <i>Scyliorhinus canicula</i>  | 100          | <i>Scyliorhinus canicula</i>         | 100          |                              |
|            | Test (3) | <i>Scyliorhinus canicula</i>  | 97             | <i>Scyliorhinus canicula</i>  | 97.9         | <i>Scyliorhinus canicula</i>         | 97.9         |                              |

| Sample no. | Test no. | GenBank                       |                | BOLD                          |              |                                      |              | Consensus identification     |
|------------|----------|-------------------------------|----------------|-------------------------------|--------------|--------------------------------------|--------------|------------------------------|
|            |          | Matched species               | Max identity % | First best matched species    | Similarity%  | 2 <sup>nd</sup> best matched species | Similarity % |                              |
| 40         | Test (1) | <i>Scyliorhinus canicula</i>  | 99             | <i>Scyliorhinus canicula</i>  | 100          | <i>Scyliorhinus canicula</i>         | 100          | <i>Scyliorhinus canicula</i> |
|            | Test (2) | <i>Scyliorhinus canicula</i>  | 99             | <i>Scyliorhinus canicula</i>  | 100          | <i>Scyliorhinus canicula</i>         | 100          |                              |
|            | Test (3) | <i>Halichoeres prosopcion</i> | 86             | X                             | X            | X                                    | X            |                              |
| 41         | Test (1) | <i>Scyliorhinus canicula</i>  | 99             | <i>Scyliorhinus canicula</i>  | 99.84        | <i>Scyliorhinus canicula</i>         | 99.84        | <i>Scyliorhinus canicula</i> |
|            | Test (2) | <i>Scyliorhinus canicula</i>  | 97             | <i>Scyliorhinus canicula</i>  | 98.55        | <i>Scyliorhinus canicula</i>         | 98.55        |                              |
|            | Test (3) | <i>Allocapnia granulata</i>   | 73             | X                             | X            | X                                    | X            |                              |
| 42         | Test (1) | <i>Scyliorhinus canicula</i>  | 99             | <i>Scyliorhinus canicula</i>  | 100          | <i>Scyliorhinus canicula</i>         | 100          | <i>Scyliorhinus canicula</i> |
|            | Test (2) | <i>Scyliorhinus canicula</i>  | 99             | <i>Scyliorhinus canicula</i>  | 100          | <i>Scyliorhinus canicula</i>         | 100          |                              |
|            | Test (3) | <i>Scyliorhinus canicula</i>  | 99             | <i>Scyliorhinus canicula</i>  | 100          | <i>Scyliorhinus canicula</i>         | 100          |                              |
| 43         | Test (1) | <i>Scyliorhinus canicula</i>  | 99             | <i>Scyliorhinus canicula</i>  | 99.84        | <i>Scyliorhinus canicula</i>         | 99.84        | <i>Scyliorhinus canicula</i> |
|            | Test (2) | <i>Scyliorhinus canicula</i>  | 99             | <i>Scyliorhinus canicula</i>  | 99.84        | <i>Scyliorhinus canicula</i>         | 99.84        |                              |
|            | Test (3) | <i>Scyliorhinus canicula</i>  | 99             | <i>Scyliorhinus canicula</i>  | 99.84        | <i>Scyliorhinus canicula</i>         | 99.84        |                              |
| 44         | Test (1) | <i>Scyliorhinus canicula</i>  | 99             | <i>Scyliorhinus canicula</i>  | 100          | <i>Scyliorhinus canicula</i>         | 100          | <i>Scyliorhinus canicula</i> |
|            | Test (2) | <i>Scyliorhinus canicula</i>  | 99             | <i>Scyliorhinus canicula</i>  | 100          | <i>Scyliorhinus canicula</i>         | 100          |                              |
|            | Test (3) | <i>Scyliorhinus canicula</i>  | 96             | <i>Scyliorhinus stellaris</i> | 97           | <i>Scyliorhinus stellaris</i>        | 97           |                              |
| 45         | Test (1) | <i>Scyliorhinus canicula</i>  | 99             | <i>Scyliorhinus canicula</i>  | 99.84        | <i>Scyliorhinus canicula</i>         | 99.84        | <i>Scyliorhinus canicula</i> |
|            | Test (2) | <i>Scyliorhinus canicula</i>  | 81             | X                             | X            | X                                    | X            |                              |
|            | Test (3) | <i>Scyliorhinus canicula</i>  | 90             | X                             | X            | X                                    | X            |                              |
| 46         | Test (1) | <i>Scyliorhinus canicula</i>  | 99             | <i>Scyliorhinus canicula</i>  | 100          | <i>Scyliorhinus canicula</i>         | 100          | <i>Scyliorhinus canicula</i> |
|            | Test (3) | <i>Scyliorhinus canicula</i>  | 91             | X                             | X            | X                                    | X            |                              |
| 47         | Test (1) | <i>Scyliorhinus canicula</i>  | 99             | <i>Scyliorhinus canicula</i>  | 100          | <i>Scyliorhinus canicula</i>         | 100          | <i>Scyliorhinus canicula</i> |
|            | Test (2) | <i>Scyliorhinus canicula</i>  | 99             | <i>Scyliorhinus canicula</i>  | 100          | <i>Scyliorhinus canicula</i>         | 100          |                              |
|            | Test (3) | <i>Scyliorhinus canicula</i>  | 99             | <i>Scyliorhinus canicula</i>  | 100          | <i>Scyliorhinus canicula</i>         | 100          |                              |
| 48         | Test (1) | <i>Scyliorhinus canicula</i>  | 99             | <i>Scyliorhinus canicula</i>  | 100          | <i>Scyliorhinus canicula</i>         | 100          | <i>Scyliorhinus canicula</i> |
|            | Test (2) | <i>Scyliorhinus canicula</i>  | 99             | <i>Scyliorhinus canicula</i>  | 100          | <i>Scyliorhinus canicula</i>         | 100          |                              |
|            | Test (3) | <i>Scyliorhinus canicula</i>  | 99             | <i>Scyliorhinus canicula</i>  | 100          | <i>Scyliorhinus canicula</i>         | 100          |                              |
| 49         | Test (1) | <i>Scyliorhinus canicula</i>  | 99             | <i>Scyliorhinus canicula</i>  | 100          | <i>Scyliorhinus canicula</i>         | 100          | <i>Scyliorhinus canicula</i> |
|            | Test (2) | <i>Scyliorhinus canicula</i>  | 99             | <i>Scyliorhinus canicula</i>  | 99.84        | <i>Scyliorhinus canicula</i>         | 99.84        |                              |
|            | Test (3) | <i>Scyliorhinus canicula</i>  | 99             | <i>Scyliorhinus canicula</i>  | 100          | <i>Scyliorhinus canicula</i>         | 100          |                              |
| 50         | Test (1) | <i>Scyliorhinus canicula</i>  | 99             | <i>Scyliorhinus canicula</i>  | 99.84        | <i>Scyliorhinus canicula</i>         | 99.84        | <i>Scyliorhinus canicula</i> |
|            | Test (2) | <i>Scyliorhinus canicula</i>  | 99             | <i>Scyliorhinus canicula</i>  | 99.84        | <i>Scyliorhinus canicula</i>         | 99.84        |                              |
|            | Test (3) | <i>Scyliorhinus canicula</i>  | 99             | <i>Scyliorhinus canicula</i>  | 99.84        | <i>Scyliorhinus canicula</i>         | 99.84        |                              |
| 51         | Test (1) | <i>Squatina squatina</i>      | 85             | <i>Squatina squatina</i>      | 99.17(solid) | <i>Squatina squatina</i>             | 99.17        | <i>Squatina squatina</i>     |
|            | Test (2) | <i>Squatina squatina</i>      | 99             | <i>Squatina squatina</i>      | 99.52(solid) | <i>Squatina squatina</i>             | 99.36        |                              |
|            | Test (3) | <i>Squatina squatina</i>      | 98             | <i>Squatina squatina</i>      | 98.53(solid) | <i>Squatina squatina</i>             | 98.37        |                              |

| Sample no. | Test no. | GenBank                         |                | BOLD                         |              |                                      |              | Consensus identification    |
|------------|----------|---------------------------------|----------------|------------------------------|--------------|--------------------------------------|--------------|-----------------------------|
|            |          | Matched species                 | Max identity % | First best matched species   | Similarity%  | 2 <sup>nd</sup> best matched species | Similarity % |                             |
| 52         | Test (1) | <i>Squatina squatina</i>        | 99             | <i>Squatina squatina</i>     | 99.53(solid) | <i>Squatina squatina</i>             | 99.37        | <i>Squatina squatina</i>    |
|            | Test (2) | <i>Squatina squatina</i>        | 98             | <i>Squatina squatina</i>     | 99.51(solid) | <i>Squatina squatina</i>             | 99.34        |                             |
|            | Test (3) | <i>Squatina squatina</i>        | 98             | <i>Squatina squatina</i>     | 99.18(solid) | <i>Squatina squatina</i>             | 99.01        |                             |
| 53         | Test (1) | <i>Squatina squatina</i>        | 84             | <i>Squatina squatina</i>     | 99.42(solid) | <i>Squatina squatina</i>             | 99.42        | <i>Squatina squatina</i>    |
|            | Test (2) | <i>Squatina squatina</i>        | 98             | <i>Squatina squatina</i>     | 99.84(solid) | <i>Squatina squatina</i>             | 99.67        |                             |
|            | Test (3) | <i>Squatina squatina</i>        | 99             | <i>Squatina squatina</i>     | 99.68(solid) | <i>Squatina squatina</i>             | 99.52        |                             |
| 54         | Test (1) | <i>Carcharhinus altimus</i>     | 99             | <i>Carcharhinus plumbeus</i> | 99.53        | <i>Carcharhinus plumbeus</i>         | 99.53        | <i>Carcharhinus altimus</i> |
|            | Test (2) | <i>Carcharhinus altimus</i>     | 99             | <i>Carcharhinus plumbeus</i> | 99.53        | <i>Carcharhinus plumbeus</i>         | 99.53        |                             |
|            | Test (3) | <i>Carcharhinus altimus</i>     | 99             | <i>Carcharhinus plumbeus</i> | 99.84        | <i>Carcharhinus plumbeus</i>         | 99.84        |                             |
| 55         | Test (1) | <i>Carcharhinus altimus</i>     | 99             | <i>Carcharhinus plumbeus</i> | 99.84        | <i>Carcharhinus plumbeus</i>         | 99.84        | <i>Carcharhinus altimus</i> |
|            | Test (2) | <i>Carcharhinus altimus</i>     | 85             | X                            | X            | X                                    | X            |                             |
| 56         | Test (2) | <i>Centroscymnus coelolepis</i> | 92             | <i>Oxynotus centrina</i>     | 100          | <i>Oxynotus centrina</i>             | 100          | <i>Oxynotus centrina</i>    |
|            | Test (3) | <i>Centroscymnus coelolepis</i> | 92             | <i>Oxynotus centrina</i>     | 100(solid)   | <i>Oxynotus centrina</i>             | 100          |                             |

**Table S1: Sequence analysis results: maximum identity using GenBank database, first and second best similarities using BOLD identification engine.**

X : indicates specimen checked for best match using BOLD identification engine, and the site could not match and diverted it to GenBank database. Consensus identification was decided depending on best similarity for the specimen, using both GenBank database and BOLD identification engine, putting into consideration the morphological and morphometric measurements.
